# Supplementary material for: Galactose oxidase models: insights from 19F NMR spectroscopy
Source: Royal Society of Chemistry journal article supplement (doi:10.1039/b813036a), 2008-11-28
Supplement: b813036a.pdf [file b813036a.pdf]

Electronic supplementary information for:

## Galactose Oxidase models: Insights from $^{19}\text{F}$ NMR spectroscopy

By Fabien Michel, Sylvain Hamman, Christian Philouze, Carlos Perez Del Valle, Eric Saint-Aman, and Fabrice Thomas.

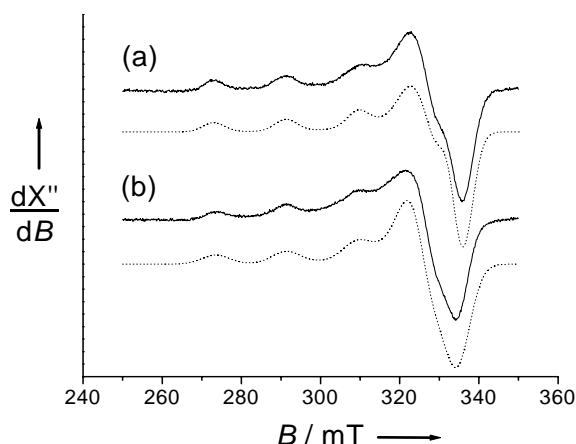

**Fig S1:** X-Band EPR spectra (solid lines) of 2 mM  $\text{CH}_3\text{CN}$  solutions of (a)  $[\text{Cu}^{\text{II}}(\text{HL}^{\text{CF}_3})(\text{CH}_3\text{CN})]^{2+}$  and (b)  $[\text{Cu}^{\text{II}}(\text{L}^{\text{CF}_3})(\text{CH}_3\text{CN})]^+$ . Dotted lines represent simulations using the parameters:  $g_{xx} = g_{yy} = 2.054$ ,  $g_{zz} = 2.240$ ,  $A_{xx} = A_{yy} = 2 \text{ mT}$ ,  $A_{zz} = 18.2 \text{ mT}$  ( $[\text{Cu}^{\text{II}}(\text{HL}^{\text{CF}_3})(\text{CH}_3\text{CN})]^{2+}$ ) and  $g_{xx} = g_{yy} = 2.064$ ,  $g_{zz} = 2.242$ ,  $A_{xx} = A_{yy} = 0.5 \text{ mT}$ ,  $A_{zz} = 17.8 \text{ mT}$  ( $[\text{Cu}^{\text{II}}(\text{L}^{\text{CF}_3})(\text{CH}_3\text{CN})]^+$ ). Microwave freq. 9.413 GHz (a) 9.417 (b), power: 20 mW; Mod. Freq. 100 kHz, amp. 0.0987 mT;  $T = 100 \text{ K}$ .

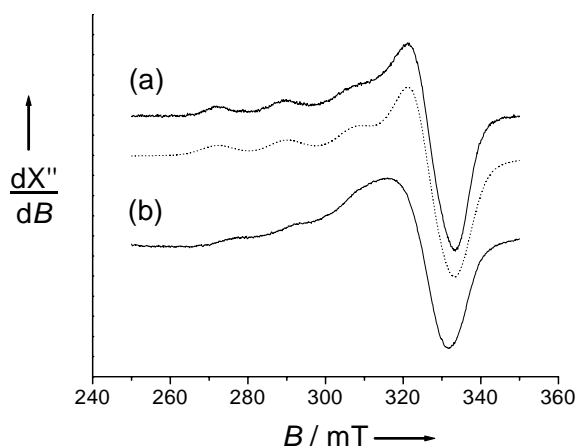

**Fig S2:** X-Band EPR spectra (solid lines) of 1 mM  $\text{CH}_3\text{CN}$  solutions of (a)  $[\text{Cu}^{\text{II}}(\text{HLq}^{\text{OMe}})(\text{CH}_3\text{CN})]^{2+}$  and (b)  $[\text{Cu}^{\text{II}}(\text{Lq}^{\text{OMe}})(\text{CH}_3\text{CN})]^+$ . Dotted lines represent a simulation using the parameters:  $g_{xx} = g_{yy} = 2.063$ ,  $g_{zz} = 2.253$ ,  $A_{xx} = A_{yy} = 0.5 \text{ mT}$ ,  $A_{zz} = 17.6 \text{ mT}$ . The spectrum of  $[\text{Cu}^{\text{II}}(\text{Lq}^{\text{OMe}})(\text{CH}_3\text{CN})]^+$  was too broad to obtain accurate spin Hamiltonian parameters by simulation. Microwave freq. 9.412 GHz (a) 9.418 (b), power: 20 mW; Mod. Freq. 100 kHz, amp. 0.0555 mT (a) 0.393 mT (b);  $T = 100 \text{ K}$ .

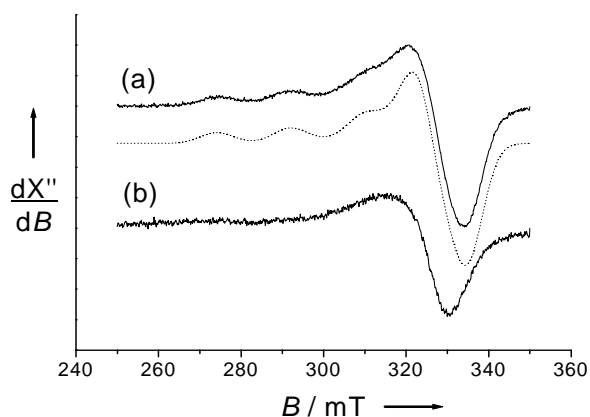

**Fig S3:** X-Band EPR spectra (solid lines) of 1 mM  $\text{CH}_3\text{CN}$  solutions of (a)  $[\text{Cu}^{\text{II}}(\text{HLq}^{\text{NO}_2})(\text{CH}_3\text{CN})]^{2+}$  and (b)  $[\text{Cu}^{\text{II}}(\text{Lq}^{\text{NO}_2})(\text{CH}_3\text{CN})]^+$ . Dotted lines represent a simulation using the parameters:  $g_{xx} = g_{yy} = 2.063$ ,  $g_{zz} = 2.238$ ,  $A_{xx} = A_{yy} = 0.5 \text{ mT}$ ,  $A_{zz} = 17.8 \text{ mT}$ . The spectrum of  $[\text{Cu}^{\text{II}}(\text{Lq}^{\text{NO}_2})(\text{CH}_3\text{CN})]^+$  was too unresolved to obtain accurate spin Hamiltonian parameters by simulation. Microwave freq. 9.418 GHz (a) 9.420 (b), power: 20 mW; Mod. Freq. 100 kHz, amp. 0.197 mT (a) 0.0987 mT (b);  $T = 100 \text{ K}$ .

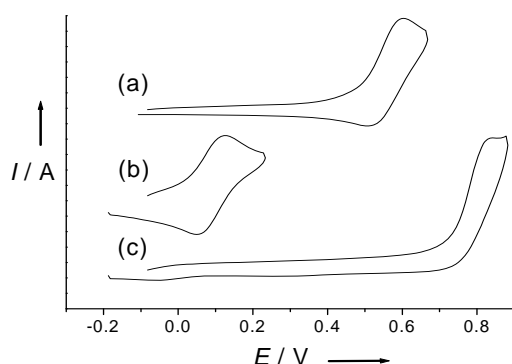

**Fig S4:** CV curves of 1 mM  $\text{CH}_3\text{CN}$  solutions (containing 0.1 M TBAP) of (a)  $[\text{Cu}^{\text{II}}(\text{L}^{\text{CF}_3})(\text{CH}_3\text{CN})]^+$ , (b)  $[\text{Cu}^{\text{II}}(\text{Lq}^{\text{OMe}})(\text{CH}_3\text{CN})]^+$ , (c)  $[\text{Cu}^{\text{II}}(\text{Lq}^{\text{NO}_2})(\text{CH}_3\text{CN})]^+$ .  $T = 298 \text{ K}$ , scan rate =  $0.1 \text{ V.s}^{-1}$ . Potentials are given relative to the  $\text{Fc}/\text{Fc}^+$  redox couple.

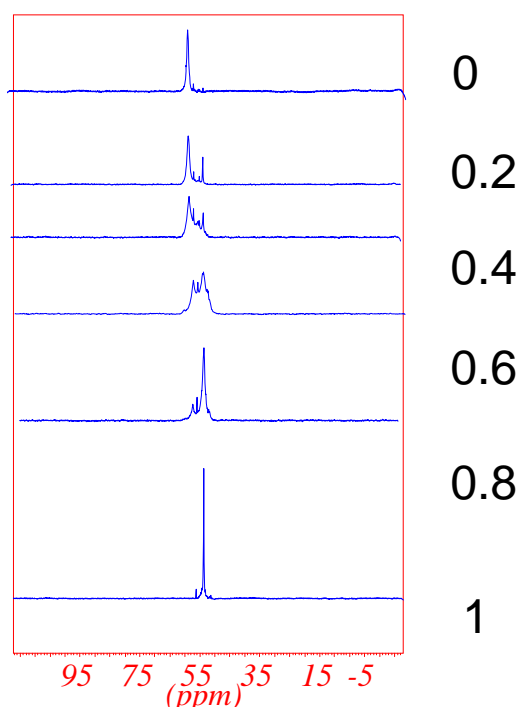

**Fig S5:** Titration of  $[\text{Cu}^{\text{II}}(\text{HLq}^{\text{OMe}})(\text{CH}_3\text{CN})]^{2+}$  (60 mM) with  $\text{NEt}_3$ ;  $^{19}\text{F}$  NMR spectra were recorded in  $(\text{CD}_3\text{CN} : \text{CH}_3\text{CN})$  (1 : 4) at 293 K. The numbers correspond to the molar equivalents of base added; intensities are normalized.

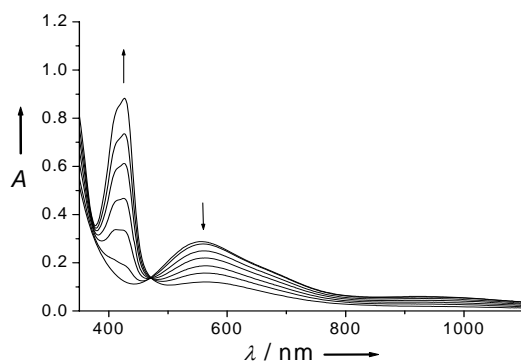

**Fig S6:** Titration of  $[\text{Cu}^{\text{II}}(\text{Lq}^{\text{OMe}})(\text{CH}_3\text{CN})]^+$  (0.3 mM) by 0 to 1 copper molar equivalent of copper(II) perchlorate. Arrows indicate spectral changes upon addition of copper; spectra recorded in  $\text{CH}_3\text{CN}$  at 238 K ( $l = 1.000$  cm).
